# Supplementary material
Source: PubMed Central journal article supplement (PMC4377070)
Supplement: NIHMS638077-supplement-1.pdf [file NIHMS638077-supplement-1.pdf]

**SUPPLEMENTARY INFORMATION**

**miR-205 acts as a tumor radiosensitizer by targeting ZEB1  
and Ubc13**

**Peijing Zhang, Li Wang, Cristian Rodriguez-Aguayo, Yuan Yuan, Bisrat G. Debeb, Dahu Chen, Yutong Sun, M. James You, Yongqing Liu, Douglas C. Dean, Wendy A. Woodward, Han Liang, Xianbin Yang, Gabriel Lopez-Berestein, Anil K. Sood, Ye Hu, K. Kian Ang, Junjie Chen and Li Ma**

Correspondence should be addressed to L.M. ([lma4@mdanderson.org](mailto:lma4@mdanderson.org))

# Supplementary Figure 1

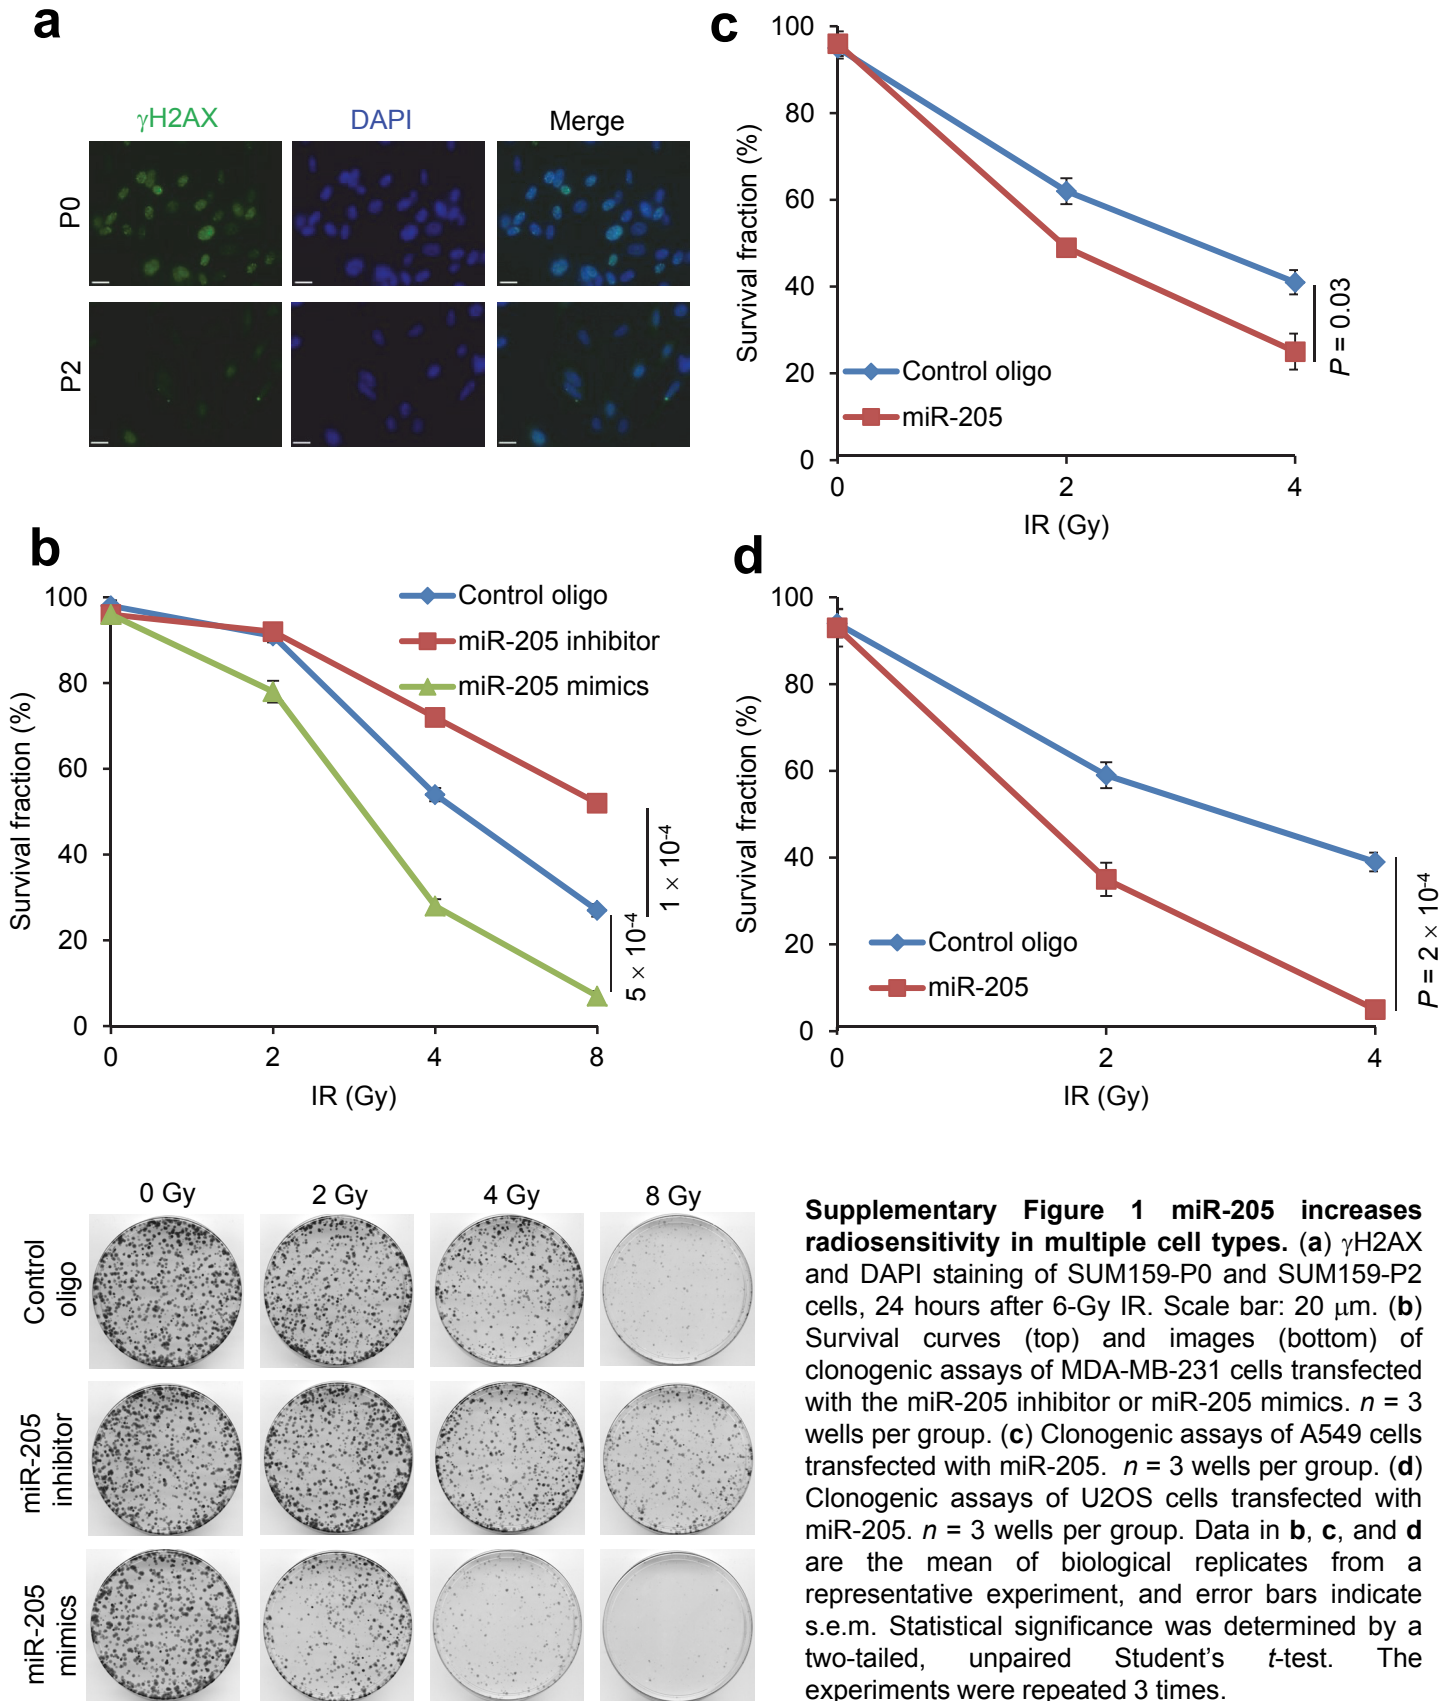

## Supplementary Figure 2

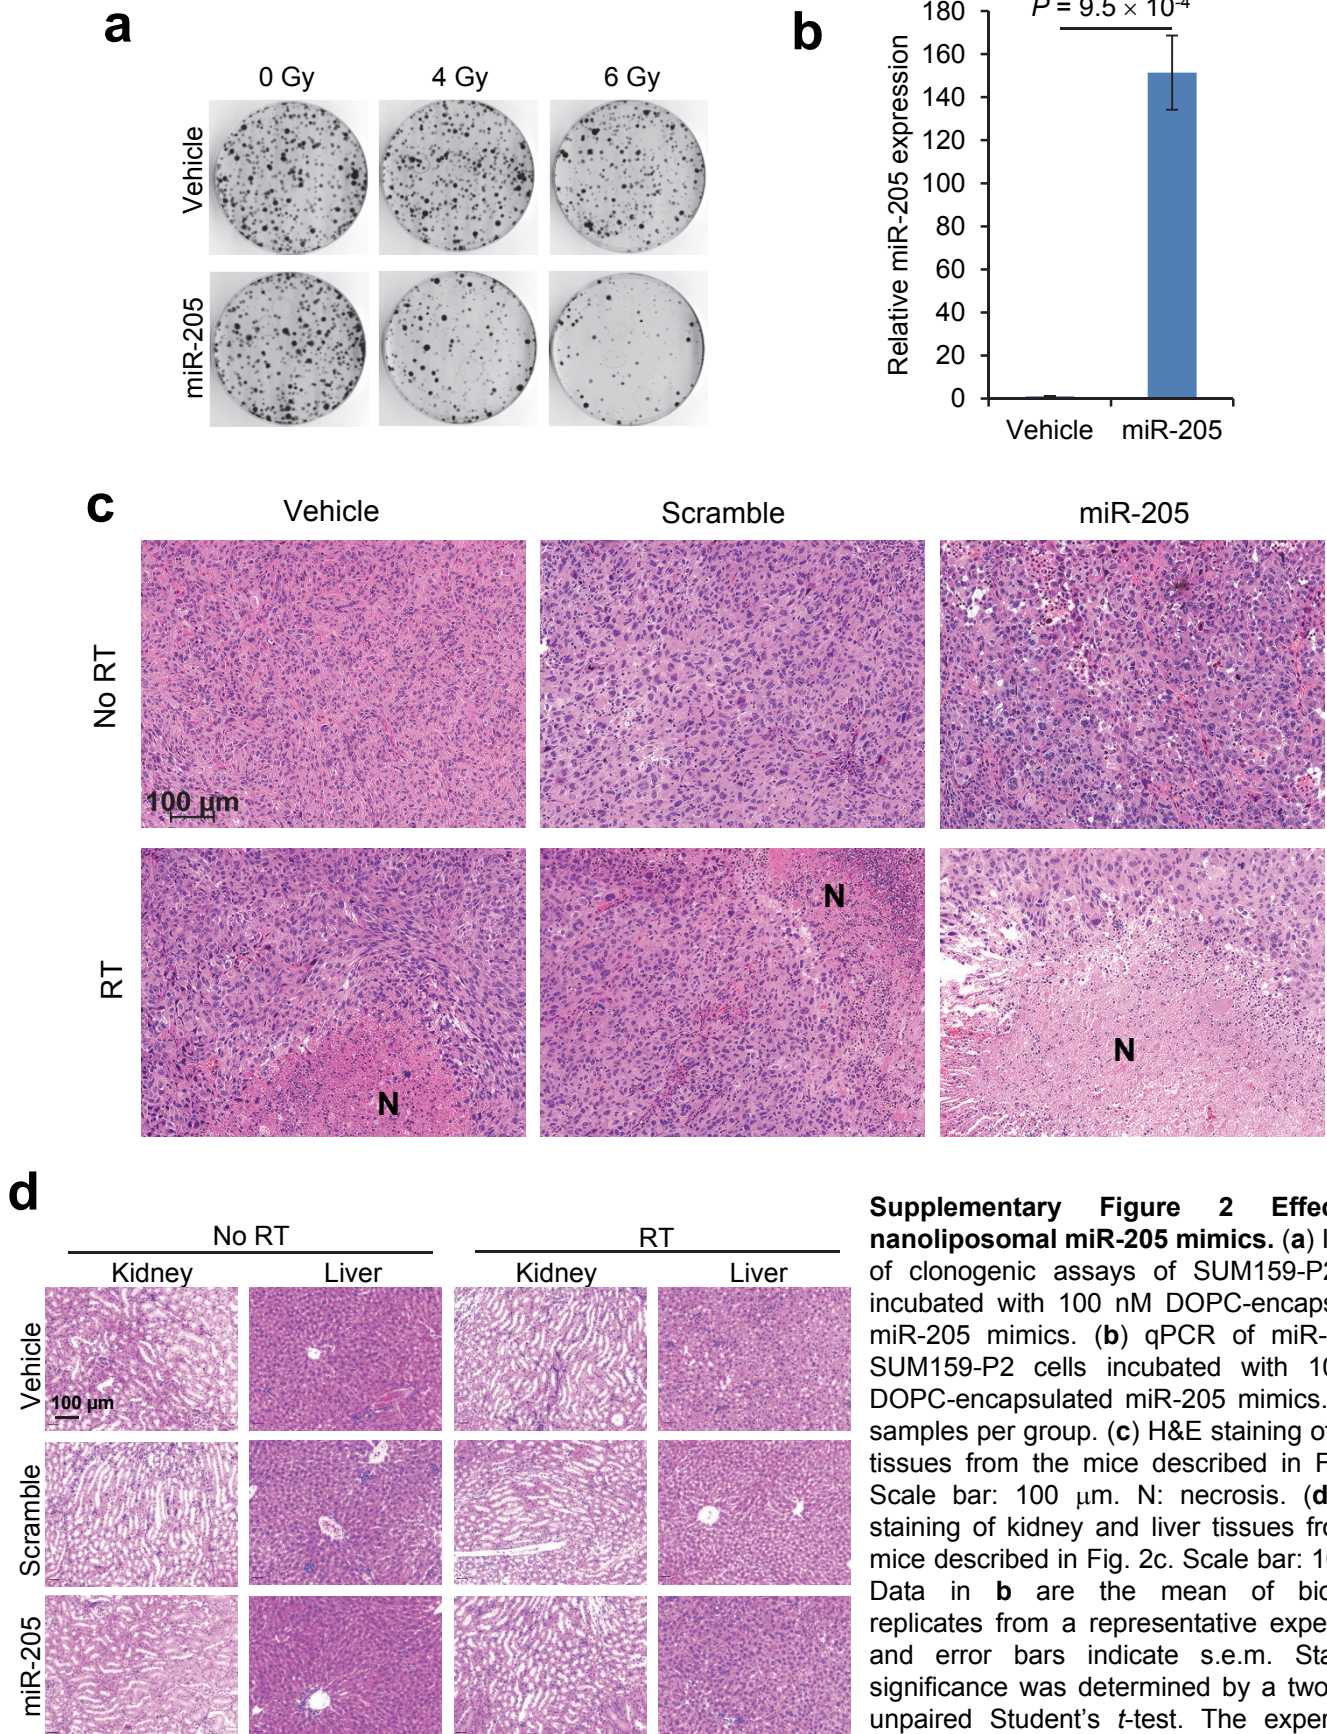

## Supplementary Figure 3

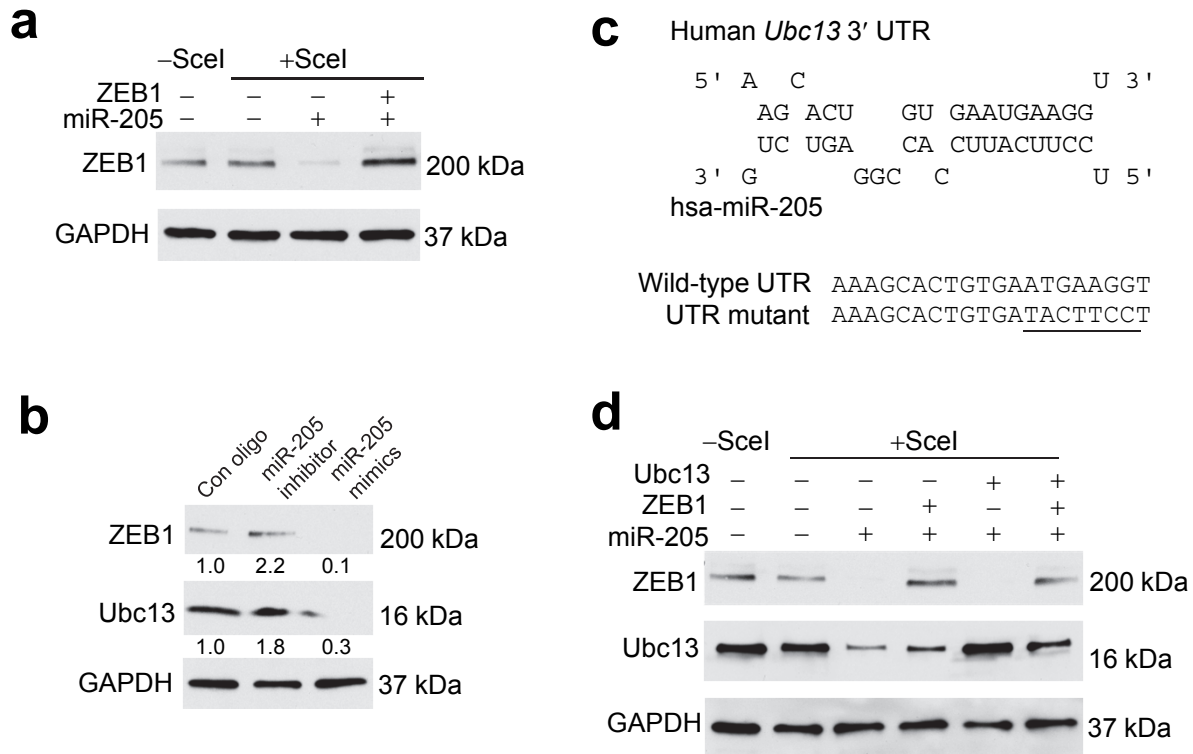

**Supplementary Figure 3 Expression levels of ZEB1 and Ubc13.** (a) Immunoblotting of ZEB1 and GAPDH in U2OS\_DR-GFP cells transfected with miR-205 alone or in combination with ZEB1. (b) Immunoblotting of ZEB1, Ubc13 and GAPDH in MDA-MB-231 cells transfected with the miR-205 inhibitor or miR-205 mimics. (c) Top: predicted duplex formation between human *Ubc13* 3' UTR and miR-205. Bottom: sequence of a mutant 3' UTR of human *Ubc13* containing mutations in the miR-205 binding site used for luciferase reporter assays in Fig. 3d. (d) Immunoblotting of Ubc13, ZEB1 and GAPDH in U2OS\_DR-GFP cells transfected with miR-205 alone or in combination with ZEB1 or Ubc13, or both.

# Supplementary Figure 4

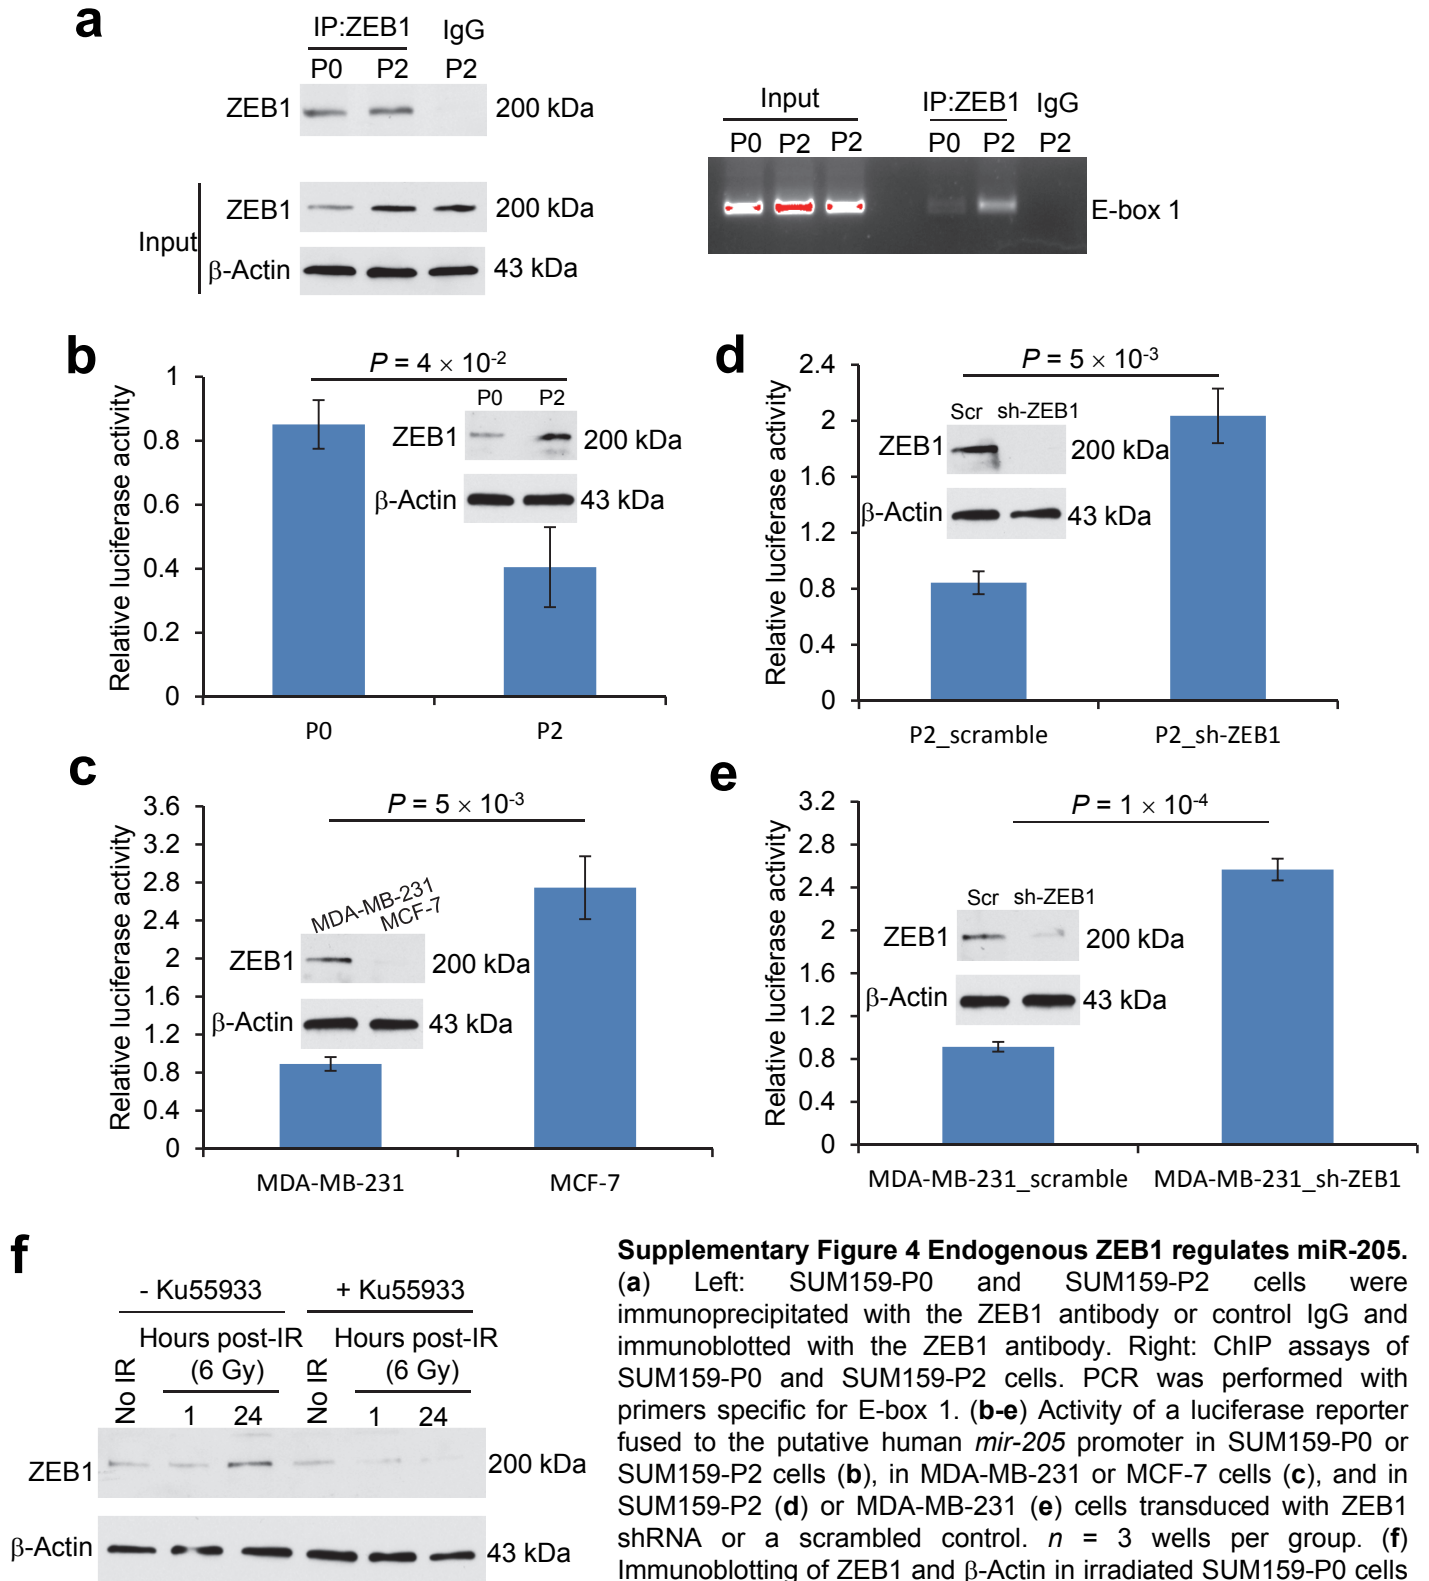

## Supplementary Figure 4 Endogenous ZEB1 regulates miR-205.

(a) Left: SUM159-P0 and SUM159-P2 cells were immunoprecipitated with the ZEB1 antibody or control IgG and immunoblotted with the ZEB1 antibody. Right: ChIP assays of SUM159-P0 and SUM159-P2 cells. PCR was performed with primers specific for E-box 1. (b-e) Activity of a luciferase reporter fused to the putative human *mir-205* promoter in SUM159-P0 or SUM159-P2 cells (b), in MDA-MB-231 or MCF-7 cells (c), and in SUM159-P2 (d) or MDA-MB-231 (e) cells transfected with ZEB1 shRNA or a scrambled control.  $n = 3$  wells per group. (f) Immunoblotting of ZEB1 and  $\beta$ -Actin in irradiated SUM159-P0 cells with or without pretreatment with the ATM inhibitor Ku55933 (10  $\mu$ M, 1 hour). Data in b-e are the mean of biological replicates from a representative experiment, and error bars indicate s.e.m. Statistical significance was determined by a two-tailed, unpaired Student's *t*-test. The experiments were repeated 3 times.

# Supplementary Figure 5

Fig. 1d

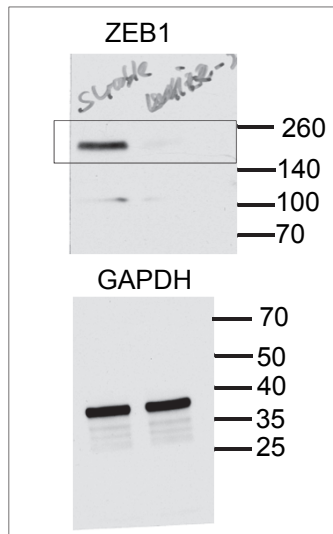

Fig. 1e

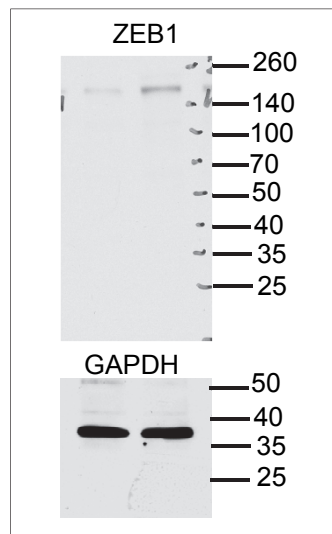

Fig. 3c

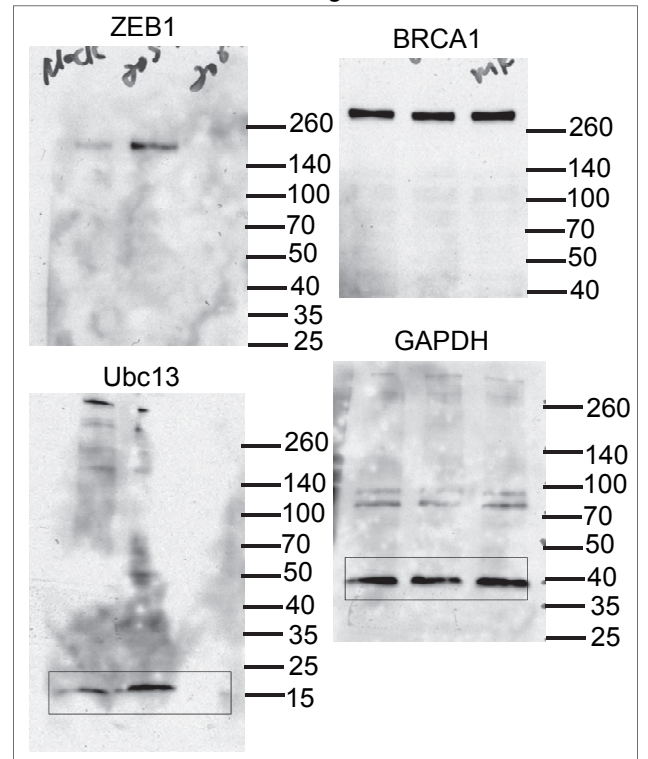

Fig. 2e

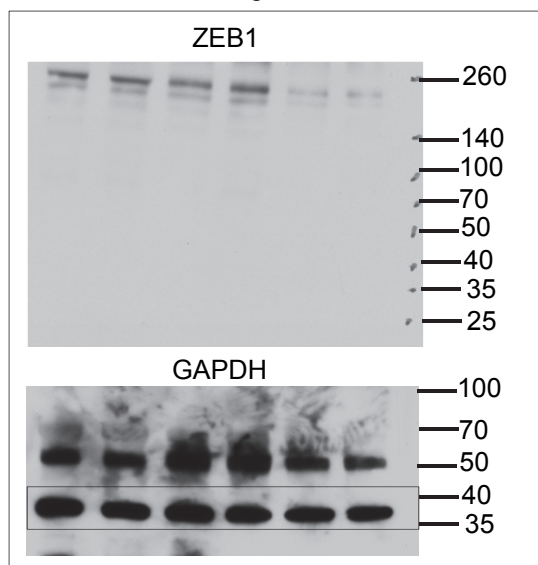

Fig. 3e

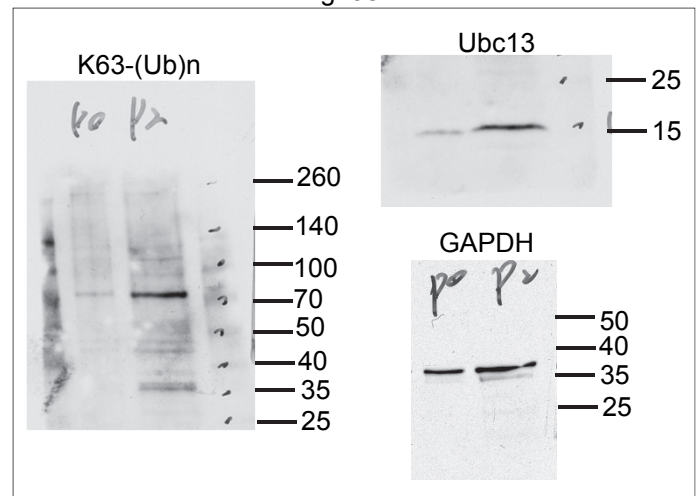

Fig. 3f

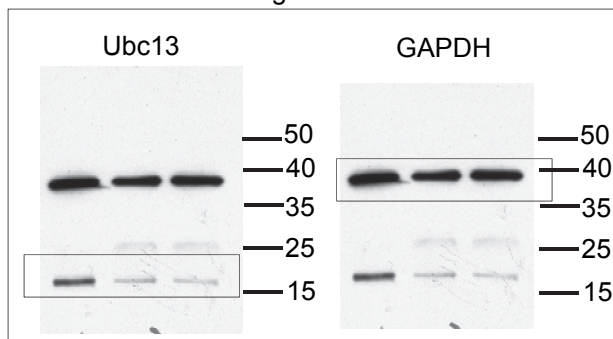

# Supplementary Figure 5 continued

Fig. 3g

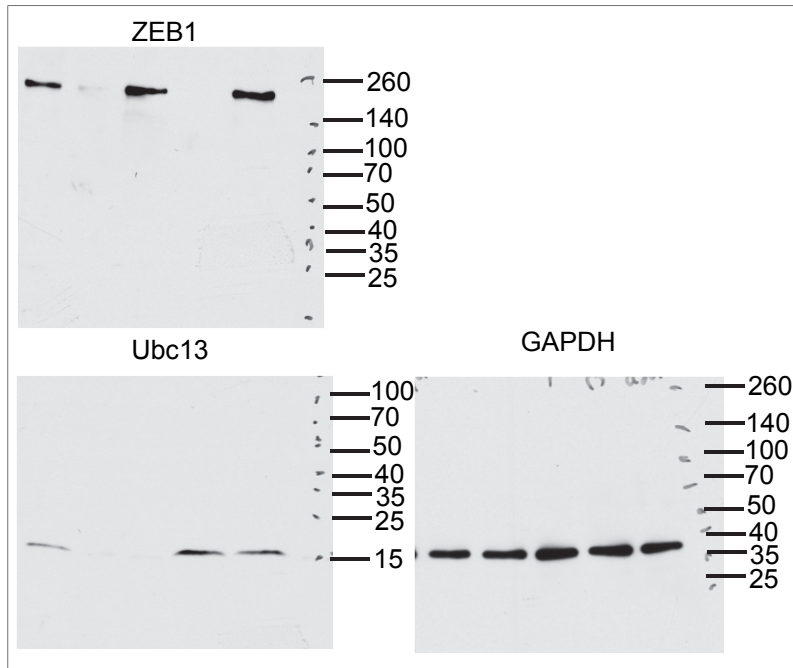

Fig. 4d

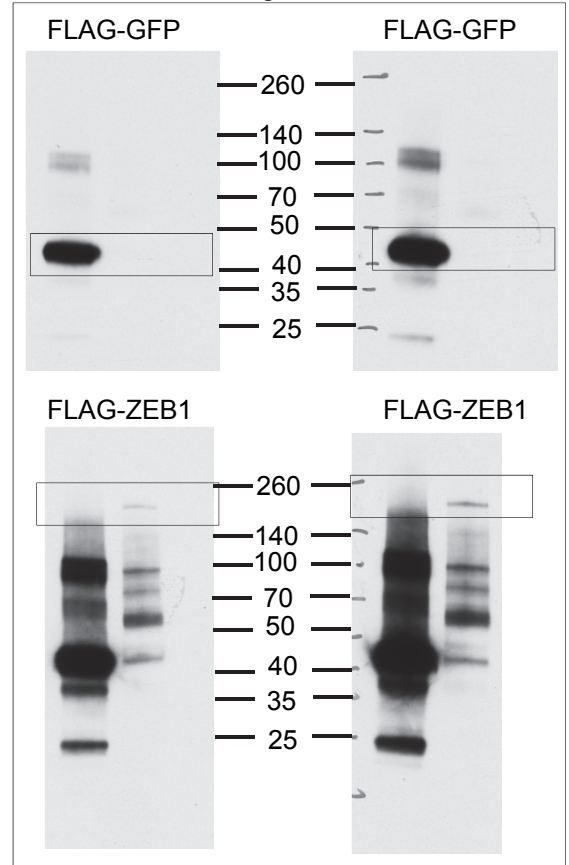

Fig. 4a

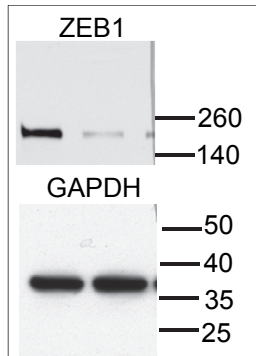

Fig. 4b

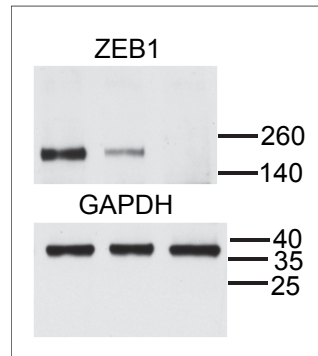

Supplementary Figure 5 Uncropped images of immunoblots (continued).

## **SUPPLEMENTARY TABLES**

**Supplementary Table 1** Layout of the miRNA PCR array.

**Supplementary Table 2** Vectors used in this study.
